# Supplementary material for: Simultaneous adsorption of ciprofloxacin drug and methyl violet dye on boron nitride nanosheets: experimental and theoretical insights
Source: Royal Society of Chemistry journal article supplement (doi:10.1039/d3cp01793a), 2023-01-01
Supplement: d3cp01793a1.pdf [file d3cp01793a1.pdf]

## Supplementary Information (SI)

# Simultaneous adsorption of ciprofloxacin drug and methyl violet dye on boron nitride nanosheets: experimental and theoretical insights

Keivan Javanmard, Saeed Farhadi\*, and Abedin Zabardasti\*

Department of Inorganic Chemistry, Faculty of Chemistry, Lorestan University, Khorramabad, 68151-44316, Iran

\*Corresponding authors: Tel: +986633120611, fax: +986633120618.

Email addresses: farhadi.s@lu.ac.ir (S. Farhadi), zabardasti.a@lu.ac.ir (A. Zabardasti)

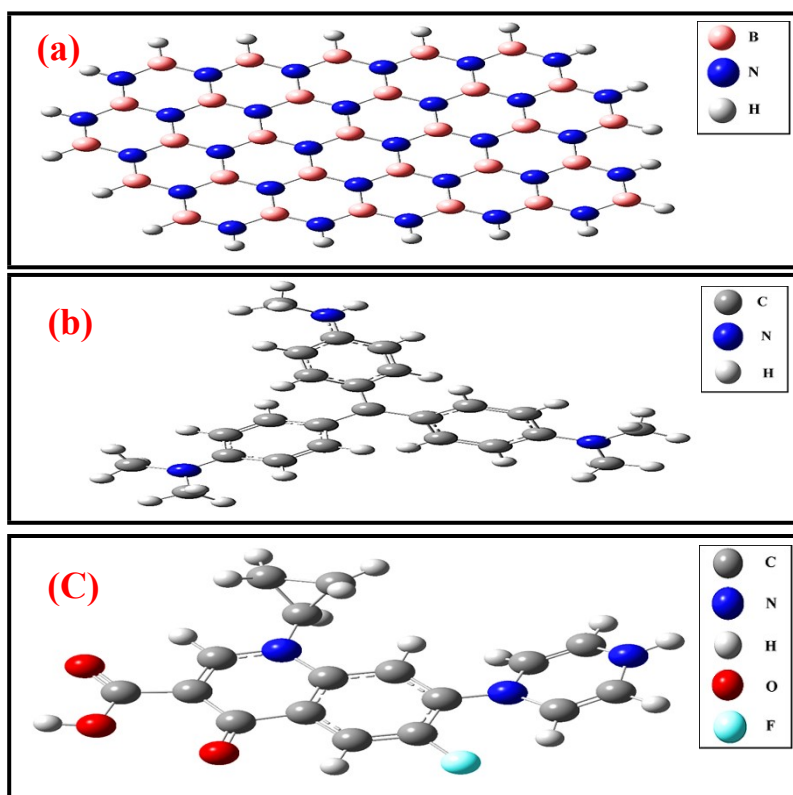

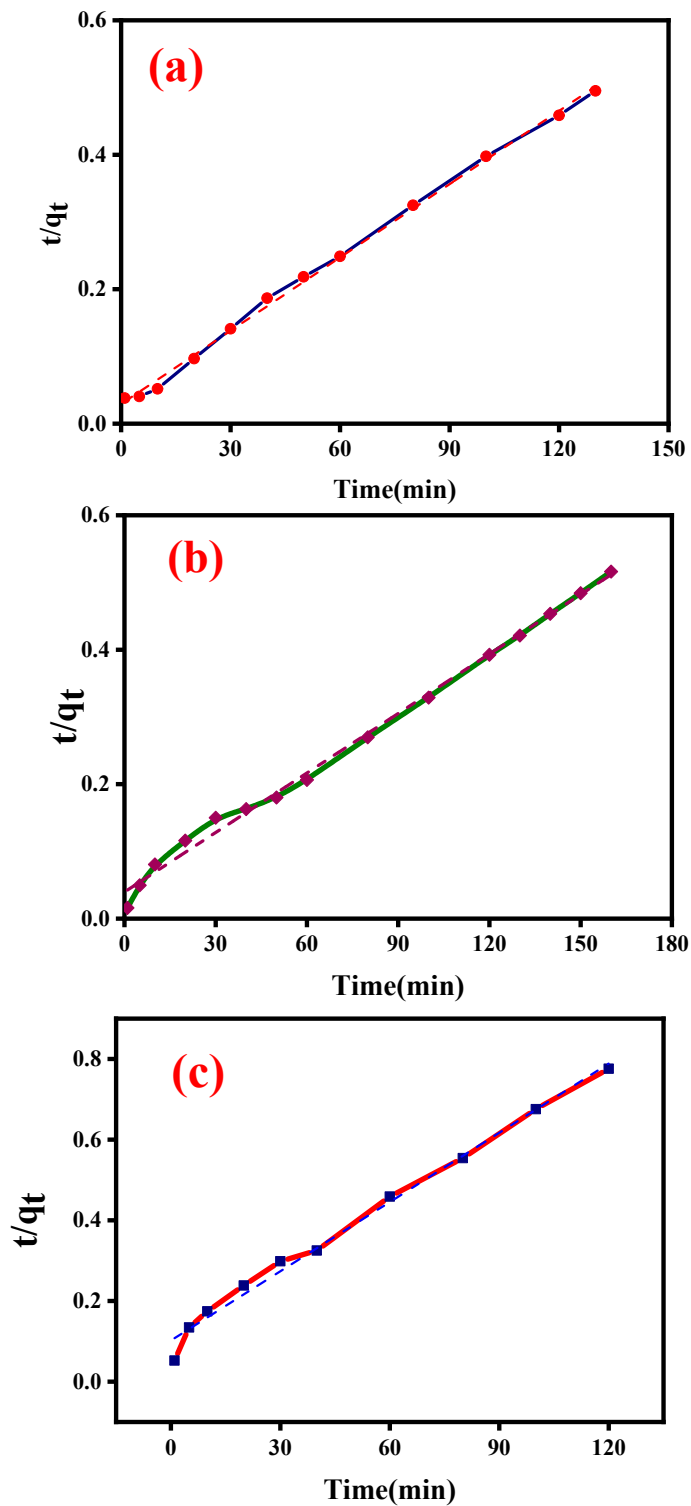

**Fig. 2S.** (a) Linear fitting of adsorption kinetic CIP with pseudo-second-order kinetic model fit, (b) linear fitting of adsorption kinetic MV with pseudo-second-order kinetic model fit, and (c) linear fitting of adsorption kinetic CIP+MV with pseudo-second-

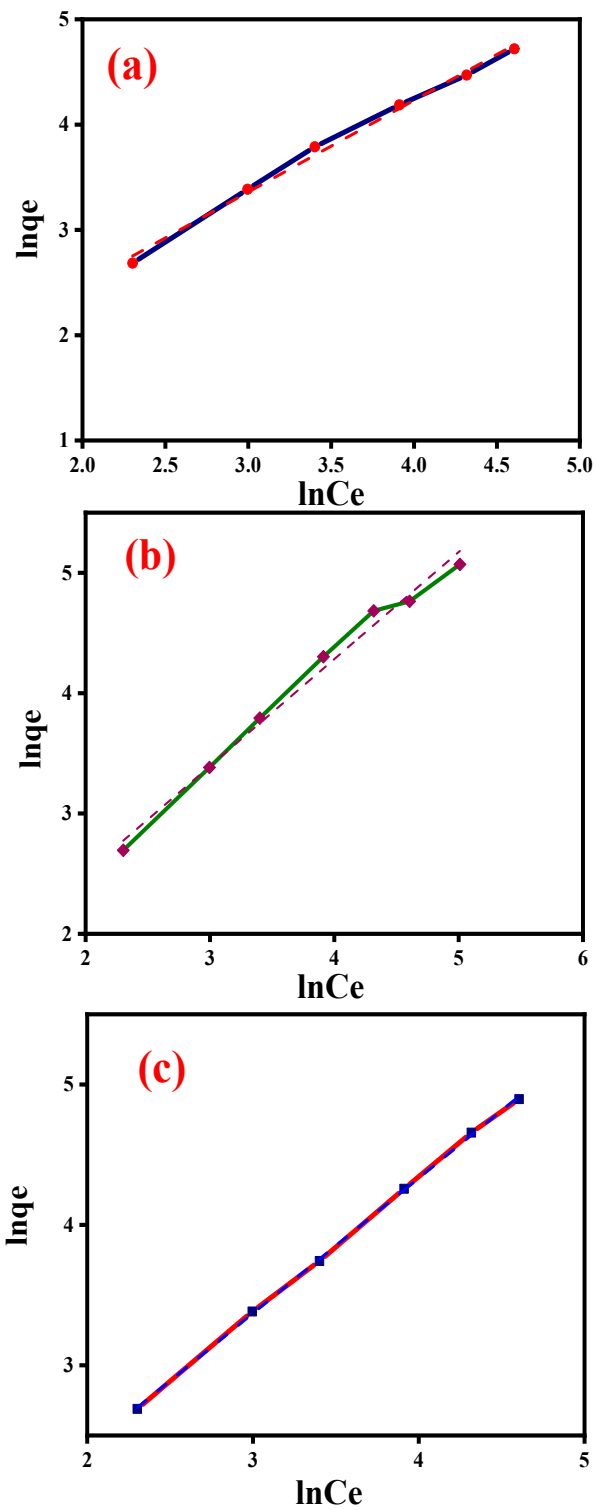

**Fig. 3S.**(a) Linear fitting of adsorption isotherm CIP with Freundlich isotherm model fit, (b) linear fitting of adsorption isotherm MV with Freundlich isotherm model fit and (c) linear fitting of adsorption isotherm CIP+MV with Freundlich isotherm model fit.

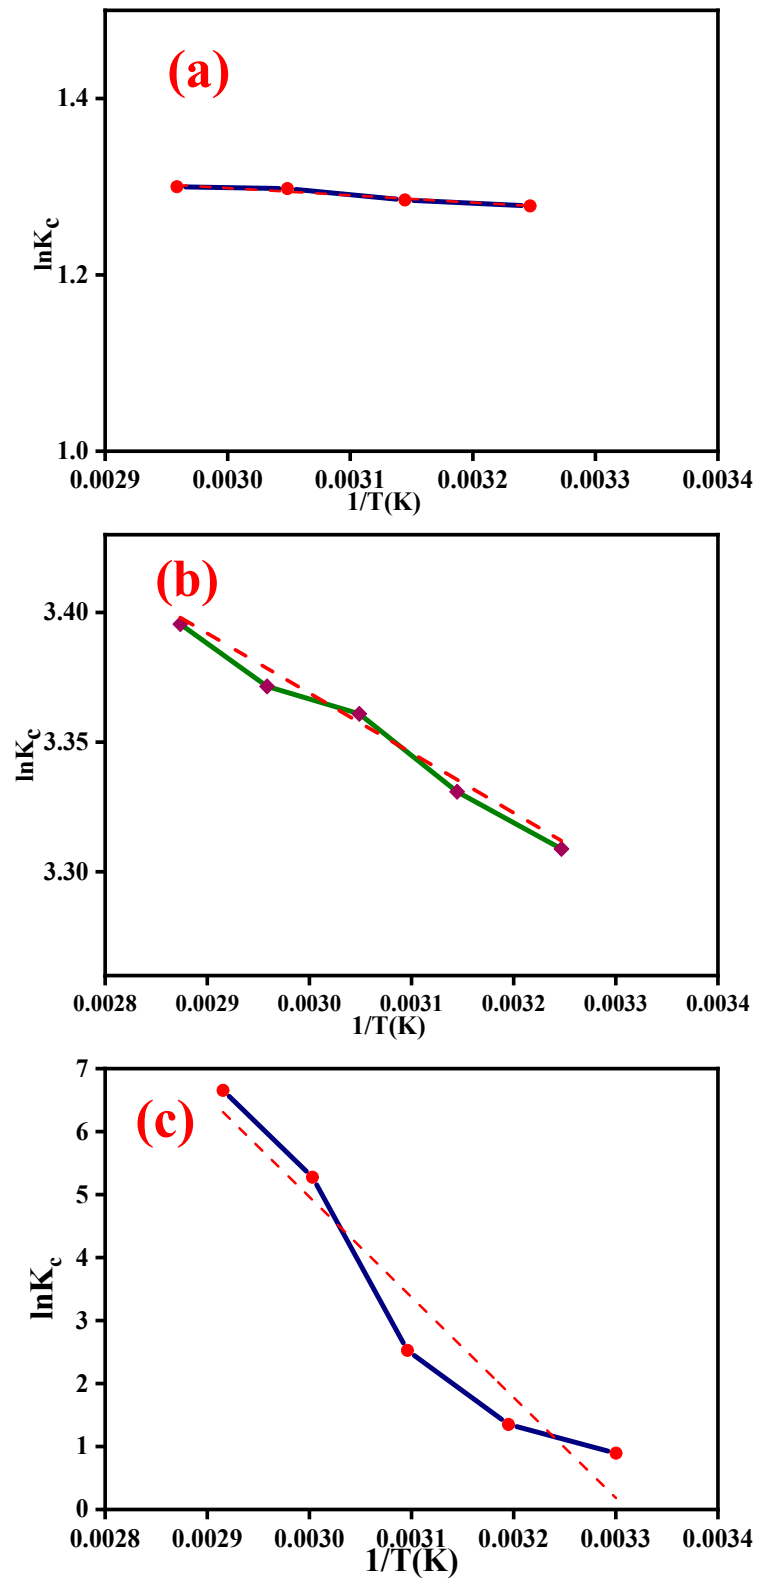

Fig. 4S. (a)-(c) linear fitting of adsorption thermodynamic CIP, CIP+MV, and MV

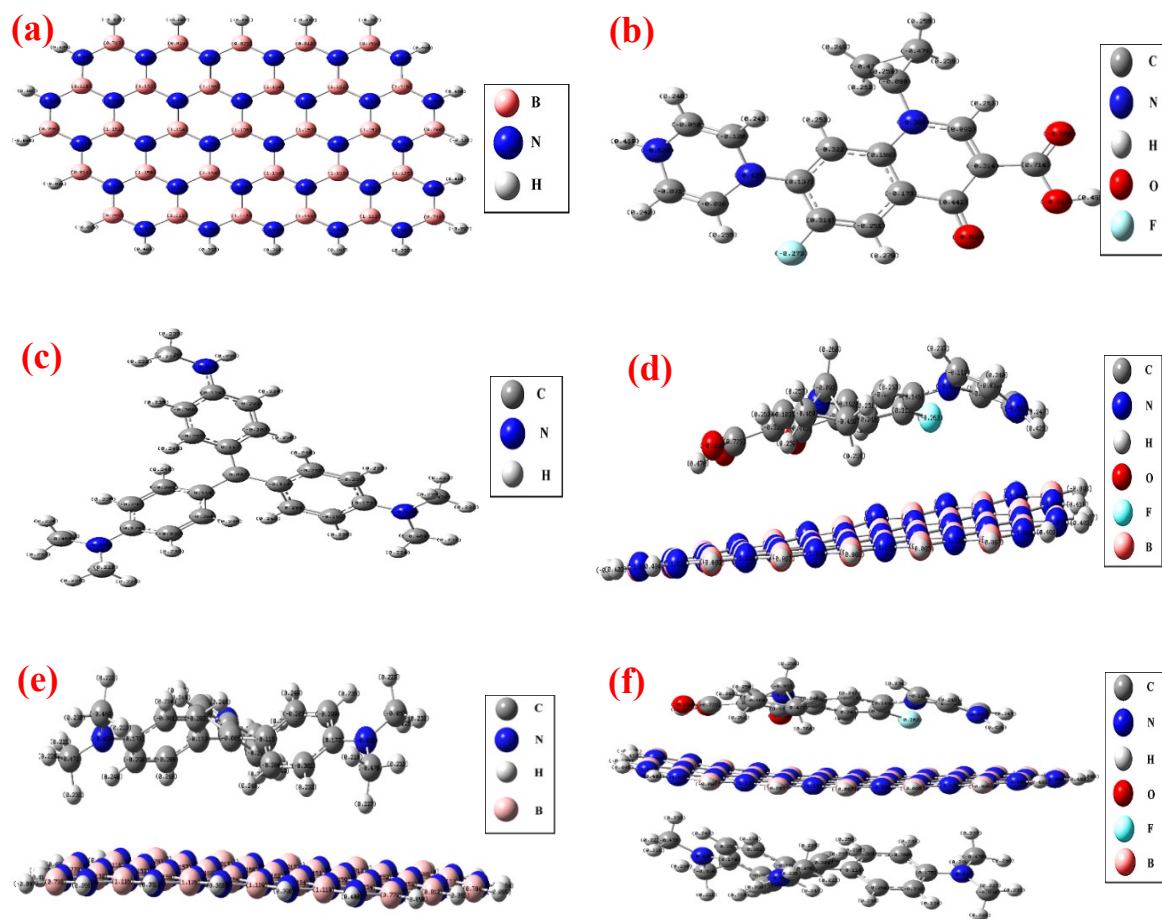

**Fig. 5S.** The NBO atomic charges of atoms for (a) BNNS, (b) CIP, (c) MV, (d) CIP...BN, (e) MV...BN and (f) MV...BN...CIP

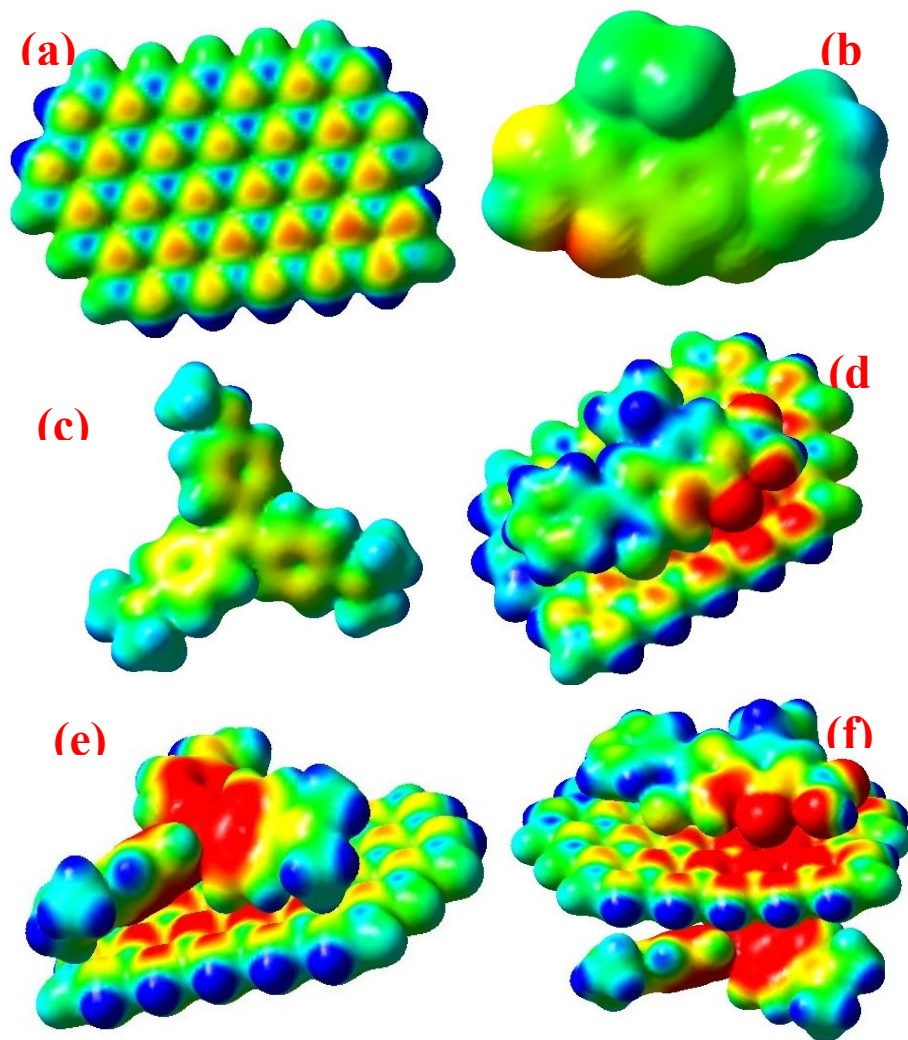

**Fig.6S.** The Molecular surface electrostatic potential (a) BNNS, (b) CIP, (c) MV, (d) CIP...BN, (e) MV...BN and (f) MV...BN...CIP

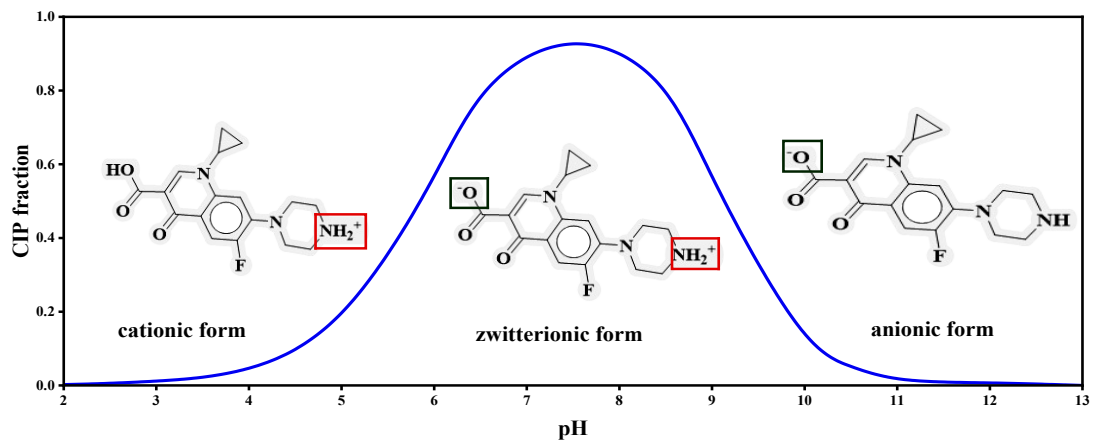

Molecular structure of CIP in different

Chemical structures of CIP in different ionization states are shown above the graph. The cationic form has a protonated piperazine ring (NH<sub>2</sub><sup>+</sup>), the zwitterionic form has a neutral piperazine ring (NH<sub>2</sub>) and a deprotonated carboxylic acid group (COO<sup>-</sup>), and the anionic form has a neutral piperazine ring (NH) and a deprotonated carboxylic acid group (COO<sup>-</sup>).

**Table 1S.** Second order perturbation theory analysis of Fock matrix in NBO

| Donor(i)                              | Acceptor (i)                           | E(2) <sup>a</sup> (kJmol <sup>-1</sup> ) | E(j)-E(i) <sup>b</sup> (a.u.) | F(i,j) <sup>c</sup> (a.u.) |
|---------------------------------------|----------------------------------------|------------------------------------------|-------------------------------|----------------------------|
| <b>CIP to BN in CIP...BN</b>          |                                        |                                          |                               |                            |
| p F <sub>116</sub>                    | π* B <sub>25</sub> -N <sub>54</sub>    | 5.72                                     | 0.46                          | 0.048                      |
| p O <sub>111</sub>                    | π* B <sub>28</sub> -N <sub>57</sub>    | 4.50                                     | 0.35                          | 0.036                      |
| p F <sub>116</sub>                    | π* B <sub>25</sub> -N <sub>52</sub>    | 2.62                                     | 1.12                          | 0.052                      |
| π C <sub>80</sub> - O <sub>91</sub>   | π* B <sub>27</sub> -N <sub>56</sub>    | 2.71                                     | 0.39                          | 0.031                      |
| π C <sub>109</sub> - O <sub>110</sub> | π* B <sub>39</sub> -N <sub>68</sub>    | 1.96                                     | 0.41                          | 0.026                      |
| π C <sub>85</sub> - C <sub>89</sub>   | π* B <sub>269</sub> -N <sub>55</sub>   | 1.68                                     | 0.34                          | 0.007                      |
| π C <sub>79</sub> - C <sub>83</sub>   | π* B <sub>30</sub> -N <sub>58</sub>    | 1.53                                     | 0.33                          | 0.020                      |
| p O <sub>110</sub>                    | π* B <sub>29</sub> -N <sub>70</sub>    | 1.44                                     | 0.75                          | 0.031                      |
| p O <sub>111</sub>                    | π* B <sub>28</sub> -N <sub>57</sub>    | 1.13                                     | 0.66                          | 0.026                      |
| p C <sub>81</sub>                     | π* B <sub>31</sub> -N <sub>59</sub>    | 0.95                                     | 0.17                          | 0.014                      |
| σ O <sub>111</sub> - H <sub>112</sub> | π* B <sub>28</sub> -N <sub>57</sub>    | 0.9                                      | 0.7                           | 0.025                      |
| p C <sub>86</sub>                     | π* B <sub>39</sub> -N <sub>68</sub>    | 0.75                                     | 0.17                          | 0.012                      |
| σ H <sub>84</sub> - C <sub>85</sub>   | π* B <sub>26</sub> -N <sub>55</sub>    | 0.65                                     | 0.58                          | 0.019                      |
| p F <sub>116</sub>                    | π* B <sub>25</sub> -N <sub>53</sub>    | 0.53                                     | 0.83                          | 0.019                      |
| p F <sub>116</sub>                    | π* B <sub>25</sub> -N <sub>61</sub>    | 0.51                                     | 0.83                          | 0.019                      |
| <b>BN to CIP in CIP...BN</b>          |                                        |                                          |                               |                            |
| π B <sub>28</sub> -N <sub>57</sub>    | σ* O <sub>111</sub> - H <sub>112</sub> | 1.02                                     | 0.56                          | 0.022                      |
| π B <sub>30</sub> -N <sub>58</sub>    | π* C <sub>109</sub> - O <sub>110</sub> | 0.98                                     | 0.24                          | 0.014                      |
| π B <sub>31</sub> -N <sub>59</sub>    | π* C <sub>80</sub> - O <sub>91</sub>   | 0.46                                     | 0.26                          | 0.010                      |
| π B <sub>43</sub> -N <sub>72</sub>    | σ* C <sub>92</sub> - H <sub>95</sub>   | 0.27                                     | 0.72                          | 0.013                      |
| π B <sub>26</sub> -N <sub>55</sub>    | π* C <sub>85</sub> - C <sub>89</sub>   | 0.25                                     | 0.25                          | 0.007                      |
| π B <sub>40</sub> -N <sub>69</sub>    | π* C <sub>79</sub> - C <sub>83</sub>   | 0.18                                     | 0.065                         | 0.012                      |
| π B <sub>33</sub> -N <sub>61</sub>    | π* C <sub>85</sub> - C <sub>89</sub>   | 0.10                                     | 0.27                          | 0.005                      |
| <b>MV to BN in MV ...BN</b>           |                                        |                                          |                               |                            |
| π C <sub>82</sub> - C <sub>85</sub>   | π* B <sub>39</sub> -N <sub>68</sub>    | 0.57                                     | 0.32                          | 0.016                      |
| σ C <sub>101</sub> - H <sub>96</sub>  | π* B <sub>27</sub> -N <sub>55</sub>    | 0.49                                     | 0.59                          | 0.007                      |
| π C <sub>92</sub> - C <sub>95</sub>   | π* B <sub>27</sub> -N <sub>55</sub>    | 0.49                                     | 0.32                          | 0.011                      |
| π C <sub>101</sub> - C <sub>103</sub> | π* B <sub>20</sub> -N <sub>49</sub>    | 0.44                                     | 0.32                          | 0.011                      |
| π C <sub>92</sub> - C <sub>95</sub>   | π* B <sub>18</sub> -N <sub>47</sub>    | 0.43                                     | 0.32                          | 0.011                      |
| σ C <sub>101</sub> - H <sub>104</sub> | π* B <sub>20</sub> -N <sub>49</sub>    | 0.42                                     | 0.59                          | 0.015                      |
| σ C <sub>82</sub> - H <sub>86</sub>   | π* B <sub>32</sub> -N <sub>60</sub>    | 0.40                                     | 0.59                          | 0.011                      |
| π C <sub>82</sub> - C <sub>85</sub>   | π* B <sub>32</sub> -N <sub>60</sub>    | 0.439                                    | 0.32                          | 0.010                      |
| π C <sub>101</sub> - C <sub>103</sub> | π* B <sub>21</sub> -N <sub>50</sub>    | 0.32                                     | 0.32                          | 0.009                      |
| σ C <sub>122</sub> - H <sub>123</sub> | π* B <sub>17</sub> -N <sub>57</sub>    | 0.32                                     | 0.58                          | 0.013                      |
| σ C <sub>130</sub> - H <sub>131</sub> | π* B <sub>43</sub> -N <sub>72</sub>    | 0.29                                     | 0.57                          | 0.012                      |
| π C <sub>101</sub> - C <sub>103</sub> | π* B <sub>25</sub> -N <sub>53</sub>    | 0.27                                     | 0.32                          | 0.008                      |
| σ C <sub>95</sub> - H <sub>99</sub>   | π* B <sub>17</sub> -N <sub>46</sub>    | 0.21                                     | 0.59                          | 0.011                      |
| <b>BN to MV in MV ...BN</b>           |                                        |                                          |                               |                            |
| π B <sub>22</sub> -N <sub>51</sub>    | σ* C <sub>114</sub> - H <sub>117</sub> | 1.71                                     | 0.70                          | 0.032                      |
| π B <sub>18</sub> -N <sub>47</sub>    | σ* C <sub>122</sub> - H <sub>123</sub> | 1.39                                     | 0.70                          | 0.029                      |
| π B <sub>21</sub> -N <sub>50</sub>    | σ* C <sub>103</sub> - H <sub>108</sub> | 0.26                                     | 0.73                          | 0.013                      |
| π B <sub>20</sub> -N <sub>49</sub>    | σ* C <sub>101</sub> - H <sub>104</sub> | 0.24                                     | 0.73                          | 0.012                      |
| p N <sub>73</sub>                     | σ* C <sub>30</sub> - H <sub>131</sub>  | 0.2                                      | 0.65                          | 0.012                      |
| π B <sub>27</sub> -N <sub>55</sub>    | π* C <sub>92</sub> - C <sub>95</sub>   | 0.14                                     | 0.26                          | 0.005                      |
| π B <sub>28</sub> -N <sub>56</sub>    | σ* C <sub>95</sub> - H <sub>99</sub>   | 0.14                                     | 0.71                          | 0.010                      |
| π B <sub>32</sub> -N <sub>60</sub>    | π* C <sub>82</sub> - C <sub>85</sub>   | 0.12                                     | 0.26                          | 0.005                      |
| π B <sub>21</sub> -N <sub>50</sub>    | π* C <sub>101</sub> - C <sub>103</sub> | 0.11                                     | 0.28                          | 0.005                      |



**BN to MV in MV...BN...CIP**

|                                        |                                               |      |      |       |
|----------------------------------------|-----------------------------------------------|------|------|-------|
| $\pi$ B <sub>18</sub> -N <sub>47</sub> | $\sigma^*$ C <sub>122</sub> -H <sub>123</sub> | 1.54 | 0.70 | 0.031 |
| $\pi$ B <sub>22</sub> -N <sub>51</sub> | $\sigma^*$ C <sub>114</sub> -H <sub>117</sub> | 1.46 | 0.70 | 0.030 |
| p N <sub>73</sub>                      | $\sigma^*$ C <sub>130</sub> -H <sub>131</sub> | 0.32 | 0.64 | 0.015 |
| $\pi$ B <sub>20</sub> -N <sub>49</sub> | $\sigma^*$ C <sub>101</sub> -H <sub>104</sub> | 0.29 | 0.73 | 0.014 |
| $\pi$ B <sub>21</sub> -N <sub>50</sub> | $\sigma^*$ C <sub>103</sub> -H <sub>108</sub> | 0.26 | 0.73 | 0.013 |
| $\pi$ B <sub>28</sub> -N <sub>56</sub> | $\sigma^*$ C <sub>95</sub> -H <sub>99</sub>   | 0.22 | 0.70 | 0.012 |
| $\pi$ B <sub>27</sub> -N <sub>55</sub> | $\pi^*$ C <sub>92</sub> -C <sub>95</sub>      | 0.20 | 0.26 | 0.006 |
| $\pi$ B <sub>32</sub> -N <sub>60</sub> | $\pi^*$ C <sub>82</sub> -C <sub>85</sub>      | 0.17 | 0.26 | 0.006 |

**MV to BN in MV...BN...CIP**

|                                             |                                          |      |      |       |
|---------------------------------------------|------------------------------------------|------|------|-------|
| $\sigma$ C <sub>92</sub> -H <sub>96</sub>   | $\pi^*$ B <sub>27</sub> -N <sub>55</sub> | 0.66 | 0.06 | 0.019 |
| $\pi$ C <sub>92</sub> -C <sub>95</sub>      | $\pi^*$ B <sub>27</sub> -N <sub>55</sub> | 0.54 | 0.33 | 0.012 |
| $\pi$ C <sub>101</sub> -C <sub>103</sub>    | $\pi^*$ B <sub>20</sub> -N <sub>49</sub> | 0.50 | 0.32 | 0.011 |
| $\pi$ C <sub>82</sub> -C <sub>85</sub>      | $\pi^*$ B <sub>39</sub> -N <sub>68</sub> | 0.49 | 0.32 | 0.010 |
| $\pi$ C <sub>92</sub> -C <sub>95</sub>      | $\pi^*$ B <sub>18</sub> -N <sub>47</sub> | 0.44 | 0.33 | 0.011 |
| $\sigma$ C <sub>101</sub> -H <sub>104</sub> | $\pi^*$ B <sub>20</sub> -N <sub>49</sub> | 0.45 | 0.59 | 0.016 |
| $\sigma$ C <sub>82</sub> -H <sub>86</sub>   | $\pi^*$ B <sub>39</sub> -N <sub>68</sub> | 0.41 | 0.59 | 0.008 |
| $\pi$ C <sub>82</sub> -C <sub>85</sub>      | $\pi^*$ B <sub>32</sub> -N <sub>60</sub> | 0.40 | 0.32 | 0.010 |
| $\sigma$ C <sub>82</sub> -H <sub>86</sub>   | $\sigma^*$ B <sub>25</sub>               | 0.31 | 0.27 | 0.009 |
| $\pi$ C <sub>101</sub> -C <sub>103</sub>    | $\pi^*$ B <sub>21</sub> -N <sub>50</sub> | 0.30 | 0.31 | 0.009 |
| $\sigma$ C <sub>95</sub> -H <sub>99</sub>   | $\pi^*$ B <sub>18</sub> -N <sub>47</sub> | 0.25 | 0.60 | 0.007 |

**BN to CIP in MV...BN...CIP**

|                                        |                                               |      |      |        |
|----------------------------------------|-----------------------------------------------|------|------|--------|
| $\pi$ B <sub>19</sub> -N <sub>48</sub> | $\pi^*$ C <sub>164</sub> -O <sub>165</sub>    | 0.69 | 0.25 | 0.0012 |
| $\pi$ B <sub>18</sub> -N <sub>47</sub> | $\sigma^*$ O <sub>166</sub> -H <sub>167</sub> | 0.59 | 0.57 | 0.017  |
| $\pi$ B <sub>27</sub> -N <sub>55</sub> | $\pi^*$ C <sub>135</sub> -O <sub>146</sub>    | 0.21 | 0.26 | 0.007  |
| $\pi$ B <sub>37</sub> -N <sub>66</sub> | $\pi^*$ C <sub>156</sub> -C <sub>159</sub>    | 0.18 | 0.27 | 0.006  |
| $\pi$ B <sub>38</sub> -N <sub>67</sub> | $\pi^*$ C <sub>140</sub> -C <sub>144</sub>    | 0.17 | 0.28 | 0.006  |
| $\pi$ B <sub>31</sub> -N <sub>61</sub> | $\pi^*$ C <sub>140</sub> -C <sub>144</sub>    | 0.15 | 0.26 | 0.006  |

**CIP to BN in MV...BN...CIP**

|                                             |                                          |      |      |       |
|---------------------------------------------|------------------------------------------|------|------|-------|
| p F <sub>171</sub>                          | $\pi^*$ B <sub>39</sub> -N <sub>68</sub> | 6.09 | 0.45 | 0.049 |
| p O <sub>166</sub>                          | $\pi^*$ B <sub>18</sub> -N <sub>47</sub> | 4.85 | 0.35 | 0.038 |
| $\pi$ C <sub>135</sub> -C <sub>146</sub>    | $\pi^*$ B <sub>27</sub> -N <sub>55</sub> | 3.49 | 0.38 | 0.035 |
| p F <sub>171</sub>                          | $\pi^*$ B <sub>39</sub> -N <sub>68</sub> | 2.54 | 1.11 | 0.051 |
| p O <sub>146</sub>                          | $\pi^*$ B <sub>27</sub> -N <sub>55</sub> | 1.79 | 0.74 | 0.035 |
| $\pi$ C <sub>140</sub> -C <sub>144</sub>    | $\pi^*$ B <sub>31</sub> -N <sub>59</sub> | 1.29 | 0.33 | 0.019 |
| p O <sub>166</sub>                          | $\pi^*$ B <sub>18</sub> -N <sub>47</sub> | 1.14 | 0.66 | 0.026 |
| p C <sub>136</sub>                          | $\pi^*$ B <sub>26</sub> -N <sub>54</sub> | 1.05 | 0.16 | 0.014 |
| $\sigma$ O <sub>166</sub> -H <sub>167</sub> | $\pi^*$ B <sub>18</sub> -N <sub>47</sub> | 0.93 | 0.77 | 0.026 |
| $\pi$ C <sub>134</sub> -C <sub>138</sub>    | $\pi^*$ B <sub>19</sub> -N <sub>48</sub> | 0.92 | 0.33 | 0.016 |
| $\pi$ C <sub>143</sub> -N <sub>169</sub>    | $\pi^*$ B <sub>38</sub> -N <sub>67</sub> | 0.79 | 0.37 | 0.016 |
| p F <sub>171</sub>                          | $\pi^*$ B <sub>39</sub> -N <sub>73</sub> | 0.78 | 0.81 | 0.023 |
| $\sigma$ C <sub>156</sub> -H <sub>160</sub> | $\pi^*$ B <sub>33</sub> -N <sub>61</sub> | 0.69 | 0.59 | 0.019 |
| $\sigma$ H <sub>139</sub> -C <sub>140</sub> | $\pi^*$ B <sub>33</sub> -N <sub>61</sub> | 0.67 | 0.57 | 0.019 |
| $\pi$ C <sub>156</sub> -C <sub>159</sub>    | $\pi^*$ B <sub>37</sub> -N <sub>66</sub> | 0.65 | 0.33 | 0.014 |
| p O <sub>146</sub>                          | $\pi^*$ B <sub>30</sub> -N <sub>57</sub> | 0.62 | 0.73 | 0.020 |
| p F <sub>171</sub>                          | $\pi^*$ B <sub>39</sub> -N <sub>73</sub> | 0.52 | 1.48 | 0.025 |
| $\pi$ C <sub>144</sub> -F <sub>171</sub>    | $\pi^*$ B <sub>39</sub> -N <sub>68</sub> | 0.50 | 1.01 | 0.022 |
| $\pi$ C <sub>140</sub> -C <sub>144</sub>    | $\pi^*$ B <sub>32</sub> -N <sub>60</sub> | 0.50 | 0.32 | 0.011 |
| $\pi$ C <sub>135</sub> -O <sub>146</sub>    | $\pi^*$ B <sub>27</sub> -N <sub>59</sub> | 0.48 | 0.76 | 0.017 |

<sup>a</sup>E (2): Energy of hyperconjugative interaction (stabilization energy).<sup>b</sup> Energy difference between donor and acceptor I and j NBO orbitals.<sup>c</sup>F (i,j): The fork matrix element between I and j NBO orbitals.
